# Supplementary material
Source: PubMed Central journal article supplement (PMC2148421)

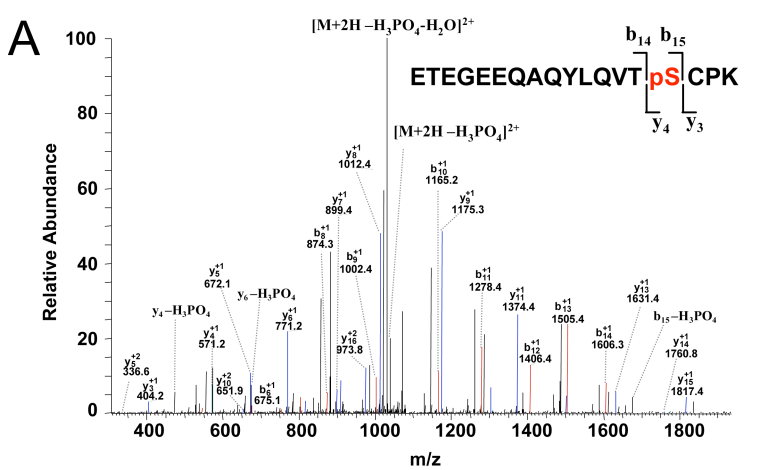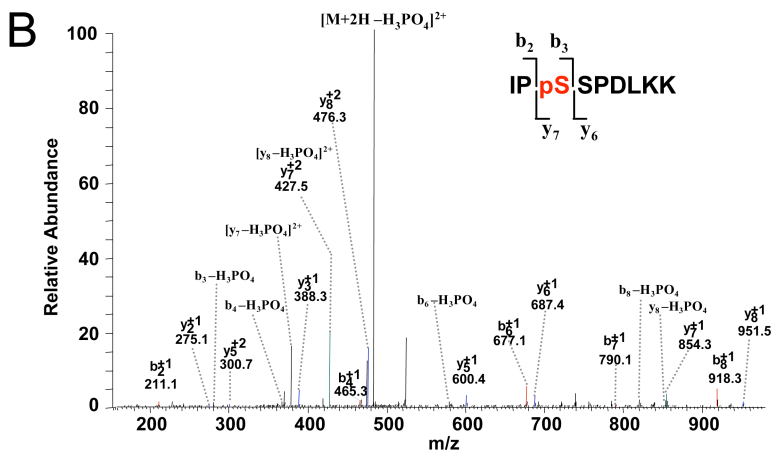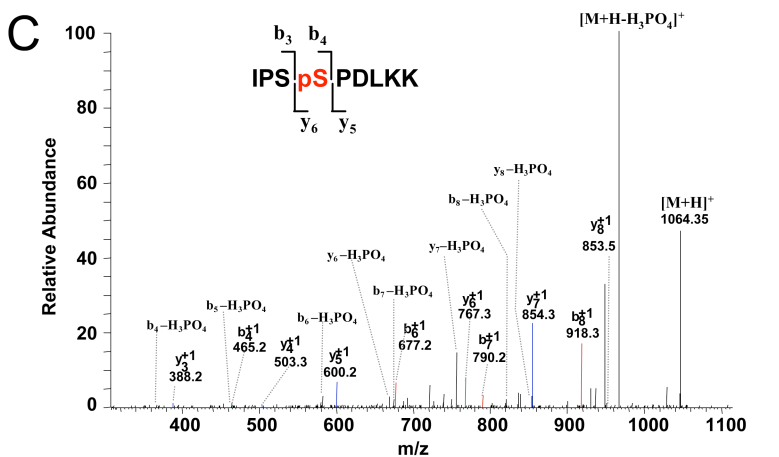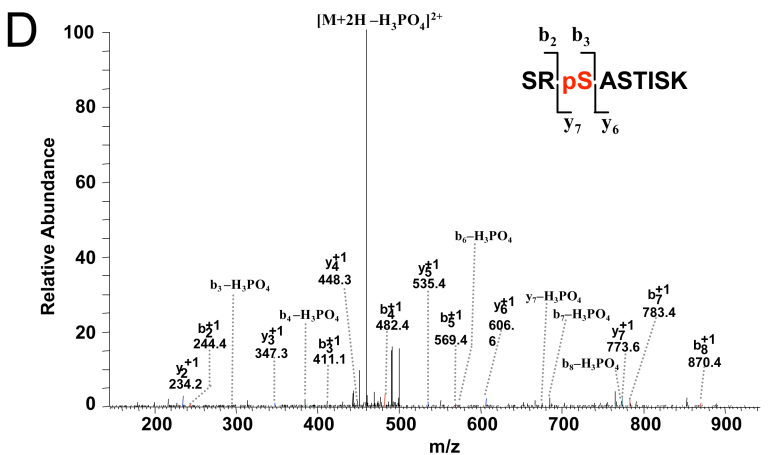

Supplement: pnas_0708574104_2.pdf [file pnas_0708574104_2.pdf]

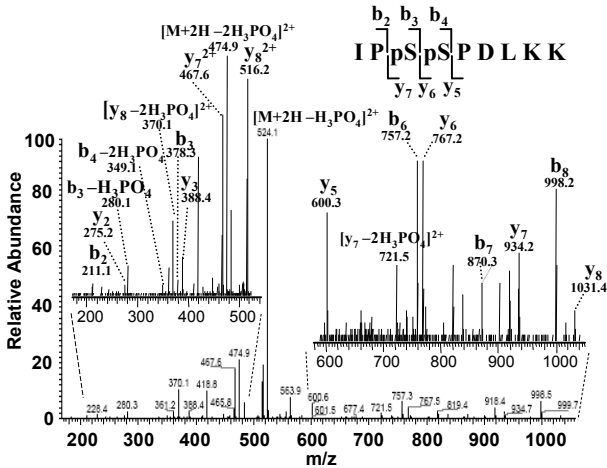

Supplement: pnas_0708574104_3.pdf [file pnas_0708574104_3.pdf]
